# Supplementary figures and images for: The effect of muscle fatigue on neuromuscular activation and force production of the quadriceps muscle
Source: Research Square preprint supplement (doi:10.21203/rs.3.rs-7501643/v1), 2025-10-15

**Distribution Plots**

**FI- J\REP**


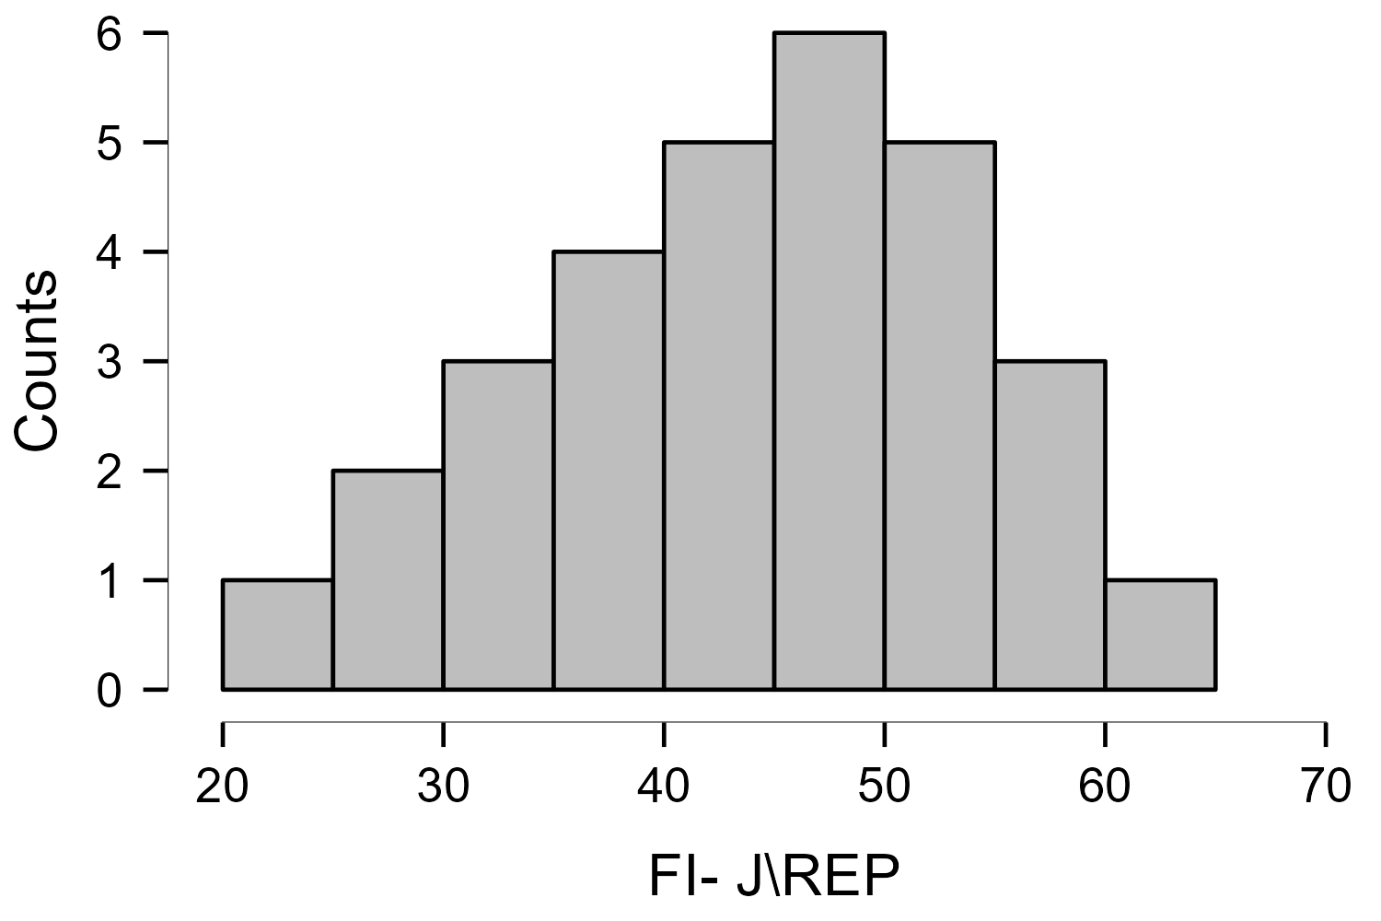


**FI- peak torque**


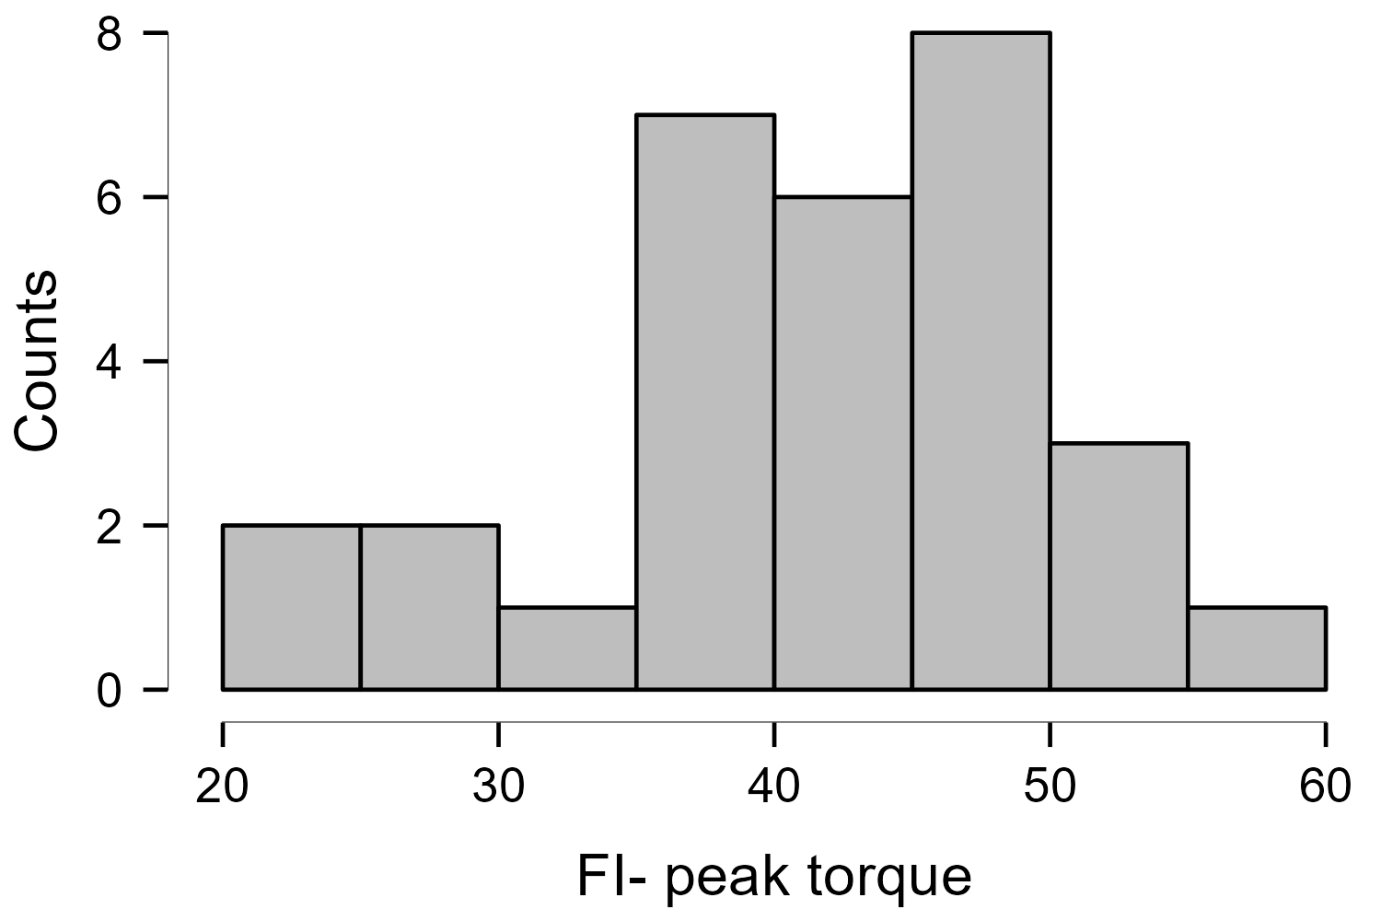


**FI- RMS**


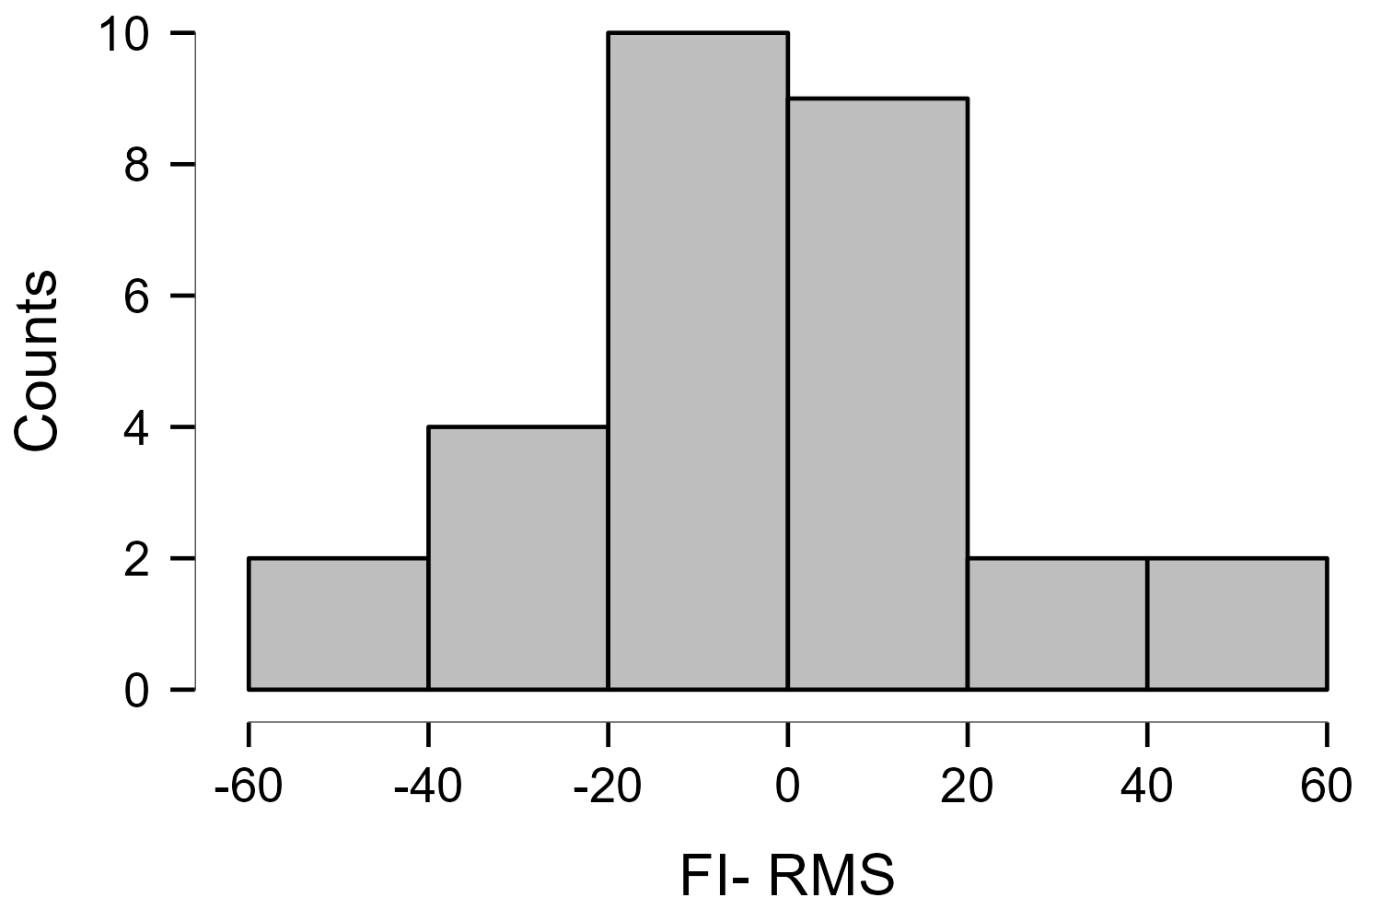


**FI- mean**


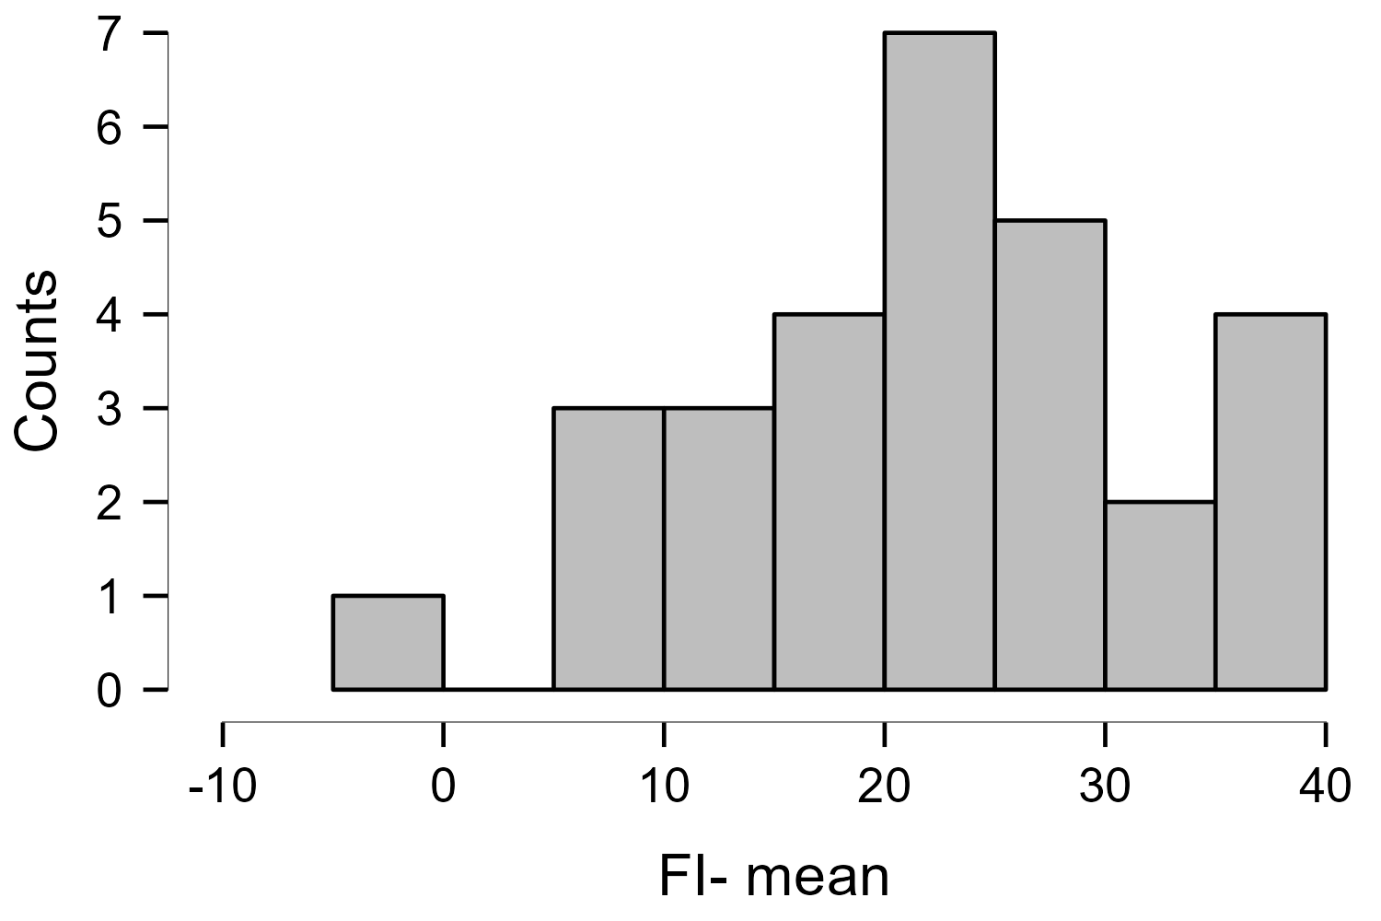

Supplement: Supplementary file 1 [file 5b7ece21139cb8fe1ebecf5b.docx]
